# Supplementary material for: Intra- and intermolecular complexation in C(6) monoazacoronand substituted cyclodextrinsElectronic supplementary information (ESI) available: 1H 600 MHz 2D ROESY NMR spectra. See http://www.rsc.org/suppdata/ob/b3/b316450k/
Source: Royal Society of Chemistry journal article supplement (doi:10.1039/b316450k), 2004-01-01
Supplement: b316450k.pdf [file b316450k.pdf]

## Supplementary Information

### Intra- and intermolecular complexation in C(6) monoazacoronand substituted cyclodextrins

Julia S. Lock,<sup>a</sup> Bruce L. May,<sup>a</sup> Philip Clements,<sup>a</sup> Stephen F. Lincoln<sup>\*a</sup> and Christopher J. Easton<sup>b</sup>

<sup>a</sup> Department of Chemistry, University of Adelaide, Adelaide, SA 5005, Australia.

E-mail: stephen.lincoln@adelaide.edu.au

<sup>b</sup> Research School of Chemistry, Australian National University, Canberra, ACT 0200, Australia.

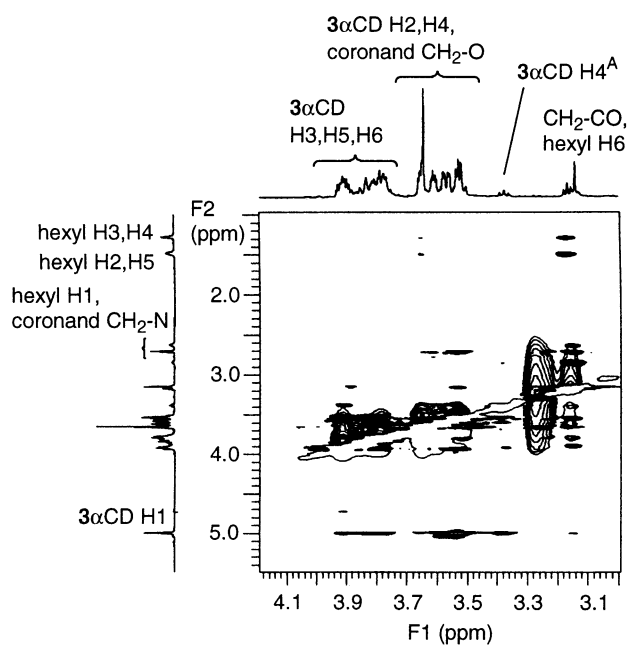

**Fig. S1.** <sup>1</sup>H 600 MHz 2D ROESY NMR spectrum at 298 K of a D<sub>2</sub>O solution in which [3]<sub>total</sub> is 0.023 mol dm<sup>-3</sup>. There are no cross-peaks to indicate intramolecular complexation of the substituent.

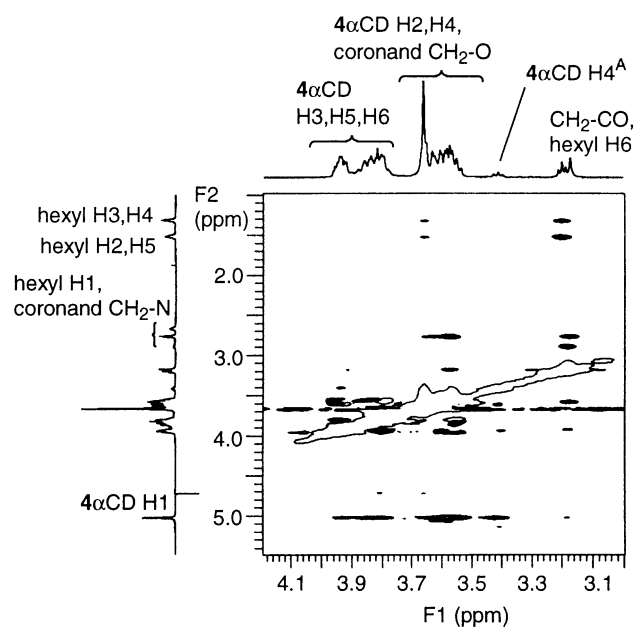

**Fig. S2.**  $^1\text{H}$  600 MHz 2D ROESY NMR spectrum at 298 K of a  $\text{D}_2\text{O}$  solution in which  $[\mathbf{4}]_{\text{total}}$  is  $0.014 \text{ mol dm}^{-3}$ . There are no cross-peaks to indicate the intramolecular complexation of the substituent.

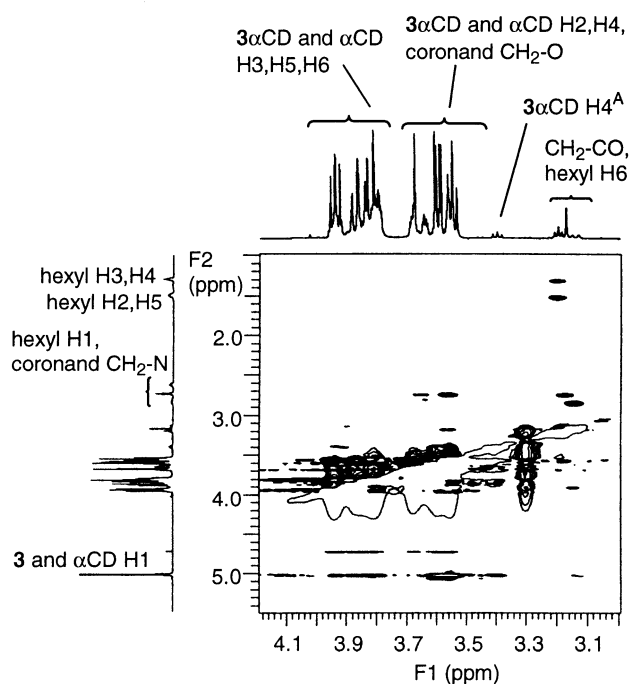

**Fig. S3.**  $^1\text{H}$  600 MHz 2D ROESY NMR spectrum at 298 K of a  $\text{D}_2\text{O}$  solution in which  $[\mathbf{3}]_{\text{total}}$  and  $[\alpha\text{CD}]_{\text{total}}$  are  $0.022 \text{ mol dm}^{-3}$  and  $0.032 \text{ mol dm}^{-3}$ , respectively. There are no cross-peaks to indicate the intermolecular complexation of the substituent.
